# Supplementary material
Source: PubMed Central journal article supplement (PMC3810086)
Supplement: ASN.2013020126_ASN2013020126SupplementaryData.pdf [file ASN.2013020126_ASN2013020126SupplementaryData.pdf]

**Supplemental Table 1. Baseline Characteristics of Validation Group Separated by type of diabetes**

|                                 | T2DM+CKD          | T1DM+CKD          |
|---------------------------------|-------------------|-------------------|
| n                               | 49                | 12                |
| Age, years                      | 64.2 ± 10.2       | 46.2 ± 5.7        |
| Race                            |                   |                   |
| White                           | 21 (44%)          | 1 (8%)            |
| Non-White                       | 27 (56%)          | 11 (92%)          |
| Gender: Male                    | 27 (55%)          | 9 (75%)           |
| Gender: Female                  | 22 (45%)          | 3 (25%)           |
| BMI, kg/m <sup>2</sup>          | 33.3 ± 7.4        | 29 ± 5.6          |
| Smoking: Ever                   | 23 (49%)          | 7 (58%)           |
| Smoking: Never                  | 24 (51%)          | 5 (42%)           |
| Systolic BP, mmHg               | 130.7 ± 12.9      | 132.3 ± 22.1      |
| Diastolic BP, mmHg              | 71.2 ± 7.3        | 75.9 ± 10         |
| Type 2 DM Duration, yrs*        | 15 (9.5, 23)      |                   |
| Type 1 DM Duration, yrs*        |                   | 30 (24.2, 37.8)   |
| HbA1c, %                        | 7.4 ± 1.3         | 7.4 ± 1.2         |
| Serum Creatinine, mg/dL         | 2.1 ± 0.8         | 2.5 ± 1.4         |
| Albumin/Creatinine Ratio*       | 0.18 (0.06, 0.73) | 0.65 (0.33, 1.61) |
| eGFR, ml/min/1.73m <sup>2</sup> | 35.4 ± 11.5       | 38.2 ± 19.8       |

\*Median (Quartile 1, Quartile 3) ; otherwise, mean ± SD or n (%) are presented.

**Supplemental Table 2 : Geometric Mean Metabolite Levels by Group**

| Metabolite                   | Control,<br>n=23          | Screening,<br>n=24        | Validation,<br>n=61       | Type 1 DM w/o<br>CKD, n=32 | Type 2 DM w/o<br>CKD, n=41 | Type I&II DM<br>w/o CKD, n=73 |
|------------------------------|---------------------------|---------------------------|---------------------------|----------------------------|----------------------------|-------------------------------|
| 3-Hydroxy<br>Isovalerate     | 37.47<br>(28.57,49.16)    | 11.39<br>(9.35,13.88)     | 12<br>(10.48,13.74)       | 42.45<br>(33.03,54.55)     | 34.27<br>(30.43,38.6)      | 37.64<br>(33.14,42.76)        |
| Aconitic Acid                | 78.02<br>(67.75,89.84)    | 54.08<br>(46.38,63.06)    | 42.43<br>(34.75,51.81)    | 96.19<br>(78.92,117.25)    | 91.5<br>(85.81,97.56)      | 93.53<br>(85.36,102.48)       |
| Citric Acid                  | 523.69<br>(427.88,640.95) | 201.26<br>(159.58,253.84) | 183.56<br>(148.59,226.76) | 719.71<br>(591.33,875.97)  | 610.26<br>(547.79,679.86)  | 656.03<br>(591.07,728.12)     |
| 2-Ethyl 3-OH<br>Propionate   | 2.04<br>(1.65,2.52)       | 1.48<br>(1.32,1.66)       | 1.19<br>(1.12,1.28)       | 2.42<br>(2.03,2.89)        | 2.19<br>(1.99,2.42)        | 2.29<br>(2.08,2.51)           |
| Glycolic Acid                | 84.39<br>(71.94,99)       | 35.36<br>(29.56,42.31)    | 37.95<br>(34.12,42.21)    | 111.19<br>(90.96,135.93)   | 85.75<br>(78.87,93.22)     | 96.09<br>(86.81,106.36)       |
| Homovanillic<br>Acid         | 15.77<br>(13.84,17.97)    | 8<br>(5.97,10.71)         | 8.39<br>(7.18,9.81)       | 13.89<br>(10.58,18.23)     | 15.94<br>(14.54,17.48)     | 15.01<br>(13.22,17.04)        |
| 3-Hydroxy<br>Isobutyrate     | 46.91<br>(37.31,58.99)    | 27.24<br>(21.96,33.78)    | 22.34<br>(17.92,27.87)    | 82.98<br>(66.36,103.75)    | 64.59<br>(58.32,71.53)     | 72.09<br>(64.31,80.8)         |
| 2-Methyl<br>Acetoacetate     | 7.77<br>(4.39,13.74)      | 3.74<br>(2.76,5.06)       | 1.25<br>(1.1,1.42)        | 9.47<br>(6.62,13.54)       | 1.62<br>(1.38,1.89)        | 3.51<br>(2.68,4.6)            |
| 3-Methyl<br>Adipic Acid      | 8.1<br>(5,13.13)          | 1.88<br>(1.41,2.5)        | 1.16<br>(1.07,1.24)       | 3.04<br>(2.59,3.57)        | 2.53<br>(2.26,2.83)        | 2.74<br>(2.49,3.01)           |
| 3-Methyl<br>Crotonyl Glycine | 4.02<br>(2.93,5.51)       | 1.52<br>(1.25,1.85)       | 1.16<br>(1.03,1.31)       | 3.5<br>(2.41,5.11)         | 2.01<br>(1.69,2.39)        | 2.56<br>(2.1,3.12)            |
| 3-Hydroxy<br>Propionate      | 3.57<br>(2.93,4.34)       | 1.62<br>(1.32,1.98)       | 1.54<br>(1.33,1.78)       | 2.02<br>(1.6,2.54)         | 3.18<br>(2.57,3.92)        | 2.6<br>(2.22,3.06)            |
| Tiglylglycine                | 2.52<br>(2.15,2.94)       | 1.62<br>(1.39,1.88)       | 1.23<br>(1.09,1.38)       | 2.08<br>(1.62,2.68)        | 2.46<br>(2.04,2.97)        | 2.29<br>(1.97,2.66)           |
| Uracil                       | 10.57<br>(8.5,13.16)      | 3.05<br>(2.18,4.27)       | 5.72<br>(4.83,6.77)       | 8.59<br>(6.88,10.71)       | 15.38<br>(13.06,18.13)     | 11.91<br>(10.29,13.8)         |

**Supplementary Table 3: Comparison of Candidate Urine Metabolites between DM CKD vs DM without CKD based on diabetic types\***

| Metabolite                | T1 DM CKD                                         | p-value** | T2 DM CKD                                        | p-value** |
|---------------------------|---------------------------------------------------|-----------|--------------------------------------------------|-----------|
|                           | vs. T1DM w/o CKD<br>Percent <sup>†</sup> (95% CI) |           | vs.T2DM w/o CKD<br>Percent <sup>†</sup> (95% CI) |           |
| 3-Hydroxy Isovalerate     | -63.05 (-78.74, -35.78)                           | 0.0008182 | -60.46 (-70.32, -47.32)                          | 4.67E-09  |
| Aconitic Acid             | -56.21 (-71.31, -33.16)                           | 0.0003387 | -37.47 (-47.38, -25.7)                           | 4.48E-07  |
| Citric Acid               | -70.15 (-82.4, -49.39)                            | 4.45E-05  | -63.38 (-74.3, -47.83)                           | 1.64E-07  |
| 2-Ethyl 3-OH Propionate   | -50.25 (-64.74, -29.8)                            | 0.0002165 | -39.01 (-49.25, -26.7)                           | 6.22E-07  |
| Glycolic Acid             | -55.52 (-71.31, -31.05)                           | 0.0006246 | -53.3 (-62.64, -41.61)                           | 9.10E-10  |
| Homovanillic Acid         | -47.37 (-70, -7.66)                               | 0.02639   | -33.82 (-51.63, -9.46)                           | 0.01037   |
| 3-Hydroxy Isobutyrate     | -62.99 (-76.71, -41.19)                           | 0.0001062 | -54.72 (-69.26, -33.3)                           | 9.81E-05  |
| 2-Methyl Acetoacetate     | -76.19 (-88.28, -51.64)                           | 0.0002198 | -14.47 (-43.36, 29.15)                           | 0.4535    |
| 3-Methyl Adipic Acid      | -58.54 (-70.84, -41.06)                           | 1.19E-05  | -41.28 (-56.06, -21.52)                          | 0.000432  |
| 3-Methyl Crotonyl Glycine | -57.36 (-81.53, -1.57)                            | 0.04603   | -25.86 (-44.98, -0.1)                            | 0.04927   |
| 3-Hydroxy Propionate      | 14.7 (-30.56, 89.48)                              | 0.5828    | -36.26 (-56.74, -6.09)                           | 0.0232    |
| Tiglylglycine             | -39.25 (-64.82, 4.9)                              | 0.07248   | -34.32 (-52.21, -9.75)                           | 0.01005   |
| Uracil                    | -35.7 (-62.07, 9.01)                              | 0.09838   | -59.73 (-73.49, -38.82)                          | 3.75E-05  |

+ Percent difference between DM+CKD vs DM w/o CKD groups, respectively

\*\* p-values based on linear models adjusted for age, race and gender, MAP, BMI, HbA1C and DM duration ; Bonferroni corrected p-value cutoff for 13 metabolite comparisons is 0.0038.

**Supplemental Table 4: Principal Components (PC1 and PC2) and weighted value (loadings)**

|                           | PC1 loadings | PC2 loadings |
|---------------------------|--------------|--------------|
| 3-Hydroxy Isovalerate     | 0.756        | 0.537        |
| Aconitic Acid             | 0.703        | 0.364        |
| Citric Acid               | 0.795        | 0.35         |
| 2-Ethyl 3-OH Propionate   | 0.61         | 0.547        |
| Glycolic Acid             | 0.755        | 0.482        |
| Homovanillic Acid         | 0.696        | 0.293        |
| 3-Hydroxy Isobutyrate     | 0.754        | 0.417        |
| 2-Methyl Acetoacetate     | 0.093        | 0.896        |
| 3-Methyl Adipic Acid      | 0.319        | 0.772        |
| 3-Methyl Crotonyl Glycine | 0.274        | 0.736        |
| 3-Hydroxy Propionate      | 0.515        | 0.168        |
| Tiglylglycine             | 0.518        | 0.308        |
| Uracil                    | 0.791        | -0.174       |

**Supplemental Table 5. Comparison of Candidate Urine Metabolites between DM CKD vs CKD without DM (FSGS) \***

| Metabolite                | DM CKD                                                 | p-value** |
|---------------------------|--------------------------------------------------------|-----------|
|                           | vs. CKD w/o DM (FSGS)<br>Percent <sup>†</sup> (95% CI) |           |
| 3-Hydroxy Isovalerate     | -3.25 (-33.72, 41.23)                                  | 0.8626    |
| Aconitic Acid             | 6.74 (-27.08, 56.25)                                   | 0.7345    |
| Citric Acid               | 27.45 (-25.96, 119.37)                                 | 0.3774    |
| 2-Ethyl 3-OH Propionate   | -15.44 (-30.82, 3.37)                                  | 0.1006    |
| Glycolic Acid             | 21.63 (-8.43, 61.56)                                   | 0.1741    |
| Homovanillic Acid         | -2.08 (-36.02, 49.87)                                  | 0.9222    |
| 3-Hydroxy Isobutyrate     | -18.54 (-52.47, 39.62)                                 | 0.4516    |
| 2-Methyl Acetoacetate     | -88.02 (-92.99, -79.52)                                | 7.35E-12  |
| 3-Methyl Adipic Acid      | -68.14 (-77.57, -54.76)                                | 4.63E-09  |
| 3-Methyl Crotonyl Glycine | -73.21 (-82.85, -58.14)                                | 7.18E-08  |
| 3-Hydroxy Propionate      | -54.29 (-69.79, -30.84)                                | 0.0003053 |
| Tiglylglycine             | -54.46 (-68.76, -33.6)                                 | 7.66E-05  |
| Uracil                    | 24.95 (-27.11, 114.17)                                 | 0.4138    |

\*Adjusted for age, race and gender.

+ Percent difference between DM+CKD vs CKD w/o DM (FSGS) groups

\*\*p-values based on ANCOVAs comparison of DM+CKD vs CKD without DM (FSGS); Bonferonni adjusted p-value cutoff is 0.0038 for 13 metabolite comparisons.

**Supplemental Table 6. Association of eGFR and ACR with Candidate Metabolites in patients with Diabetes and CKD\***

| Metabolite                | Type 1 and 2 DM+CKD<br>% change in metabolite<br>with change in eGFR<br>Percent <sup>+</sup> (95% CI) | p-value** | Type 1 and 2 DM+CKD<br>% change in metabolite<br>with change in ACR<br>Percent <sup>+</sup> (95% CI) | p-value** |
|---------------------------|-------------------------------------------------------------------------------------------------------|-----------|------------------------------------------------------------------------------------------------------|-----------|
| 3-Hydroxy Isovalerate     | 1.94 (1.14, 2.74)                                                                                     | 6.78E-06  | 2.57 (-2.2, 7.58)                                                                                    | 0.2919    |
| Aconitic Acid             | 1.01 (0.43, 1.59)                                                                                     | 0.0008407 | 0.21 (-3.06, 3.59)                                                                                   | 0.8996    |
| Citric Acid               | 1.81 (0.64, 3)                                                                                        | 0.00282   | 1.09 (-5.24, 7.85)                                                                                   | 0.7387    |
| 2-Ethyl 3-OH Propionate   | 0.43 (-0.05, 0.91)                                                                                    | 0.07982   | 2.2 (-0.39, 4.85)                                                                                    | 0.09534   |
| Glycolic Acid             | 1.6 (0.96, 2.23)                                                                                      | 3.04E-06  | -0.97 (-4.69, 2.9)                                                                                   | 0.6142    |
| Homovanillic Acid         | -0.06 (-1.08, 0.97)                                                                                   | 0.9111    | 2.94 (-2.57, 8.75)                                                                                   | 0.2971    |
| 3-Hydroxy Isobutyrate     | 0.96 (-0.28, 2.21)                                                                                    | 0.1284    | 5.52 (-1.23, 12.73)                                                                                  | 0.1094    |
| 2-Methyl Acetoacetate     | -0.34 (-1.62, 0.95)                                                                                   | 0.5963    | 10.07 (3.09, 17.51)                                                                                  | 0.004648  |
| 3-Methyl Adipic Acid      | -0.3 (-1.17, 0.58)                                                                                    | 0.5047    | 5.45 (0.74, 10.37)                                                                                   | 0.02336   |
| 3-Methyl Crotonyl Glycine | 0.83 (-0.01, 1.67)                                                                                    | 0.05354   | 4.99 (0.41, 9.77)                                                                                    | 0.0327    |
| 3-Hydroxy Propionate      | 0.5 (-0.45, 1.46)                                                                                     | 0.3008    | 0.37 (-4.67, 5.67)                                                                                   | 0.8883    |
| Tiglylglycine             | 0.12 (-0.65, 0.89)                                                                                    | 0.7634    | 0.64 (-3.45, 4.89)                                                                                   | 0.7607    |
| Uracil                    | 1.54 (0.28, 2.82)                                                                                     | 0.0173    | -4.53 (-10.88, 2.26)                                                                                 | 0.1828    |

\* eGFR untransformed in ml/min/1.73m<sup>2</sup>; Log-transformed albumin/creatinine ratio and metabolites

\*\* p-values based on linear models adjusted for age, race and gender, MAP, BMI, HbA1C and DM duration ; Bonferroni corrected p-value cutoff for 13 metabolite comparisons is 0.0038.

+ Percent change in metabolite per unit change in eGFR or log-ACR

**Supplemental Table 7. Regulation of metabolites in OAT1 and OAT3 KO Mice**

|                           | Oat1                 |                      | Oat3                 |                      | Oat1 Knockout     |
|---------------------------|----------------------|----------------------|----------------------|----------------------|-------------------|
| Metabolite                | Km ( $\mu\text{M}$ ) | Ki ( $\mu\text{M}$ ) | Km ( $\mu\text{M}$ ) | Ki ( $\mu\text{M}$ ) | Ref <sup>13</sup> |
| 3-Hydroxy Isovalerate     |                      |                      |                      |                      |                   |
| Aconitic Acid             |                      |                      |                      |                      |                   |
| Citric Acid               | Inhibitory           |                      |                      |                      |                   |
| 2-Ethyl 3-OH Propionate   |                      |                      |                      |                      |                   |
| Glycolic Acid             |                      |                      |                      | 203                  |                   |
| Homovanillic Acid         | 65                   |                      | 274                  |                      |                   |
| 3-Hydroxy Isobutyrate     |                      | 3220                 |                      |                      | Reduced in urine  |
| 2-Methyl Acetoacetate     |                      |                      |                      |                      |                   |
| 3-Methyl Adipic Acid      |                      |                      |                      |                      |                   |
| 3-Methyl Crotonyl Glycine |                      |                      |                      |                      | Reduced in urine  |
| 3-Hydroxy Propionate      |                      |                      |                      |                      | Reduced in urine  |
| Tiglylglycine             |                      |                      |                      |                      |                   |
| Uracil                    |                      |                      |                      |                      | Reduced in urine  |
